# Supplementary material for: Realizing the label-free sensitive detection of carcinoembryogenic antigen (CEA) in blood serum via a MNC-decorated flexible immunosensor
Source: Royal Society of Chemistry journal article supplement (doi:10.1039/d3ay02073h), 2024-01-01
Supplement: d3ay02073h1.pdf [file d3ay02073h1.pdf]

## Supporting Information

### Realizing the label free sensitive detection of carcinoembryogenic antigen (CEA) in blood serum *via* MNC decorated flexible immunosensor

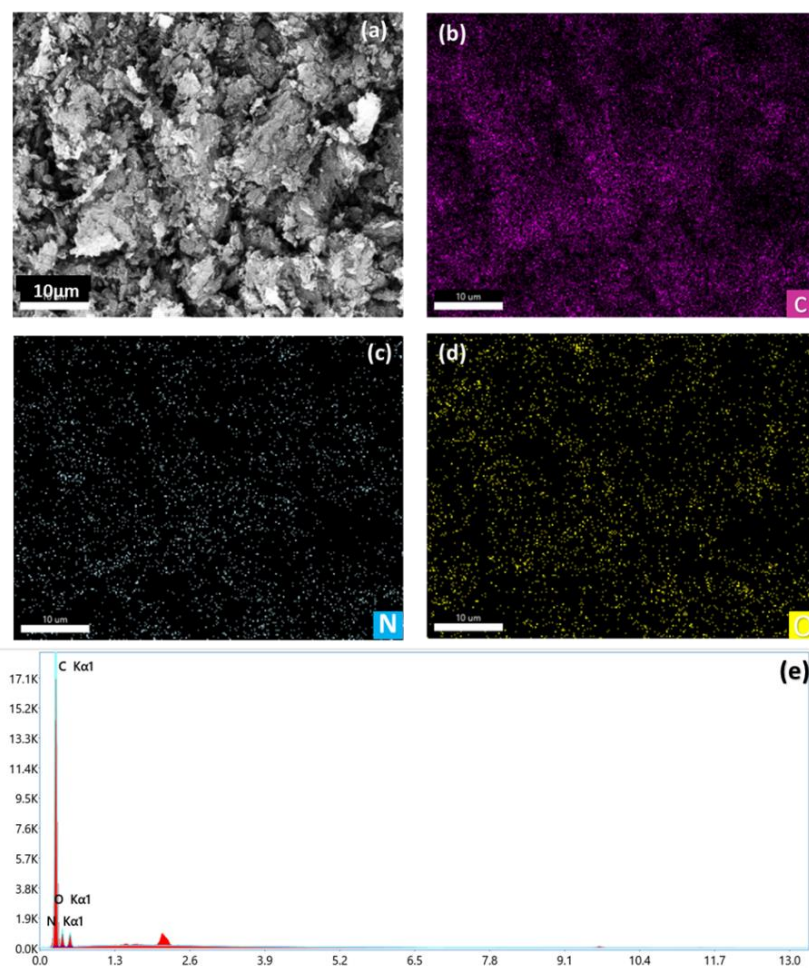

**Fig. S1** SEM image for (a) MNC-600, (b-d) Elemental dot mapping of C, N and O respectively, (e) graph showing the EDS spectra of different elements present in MNC-600.

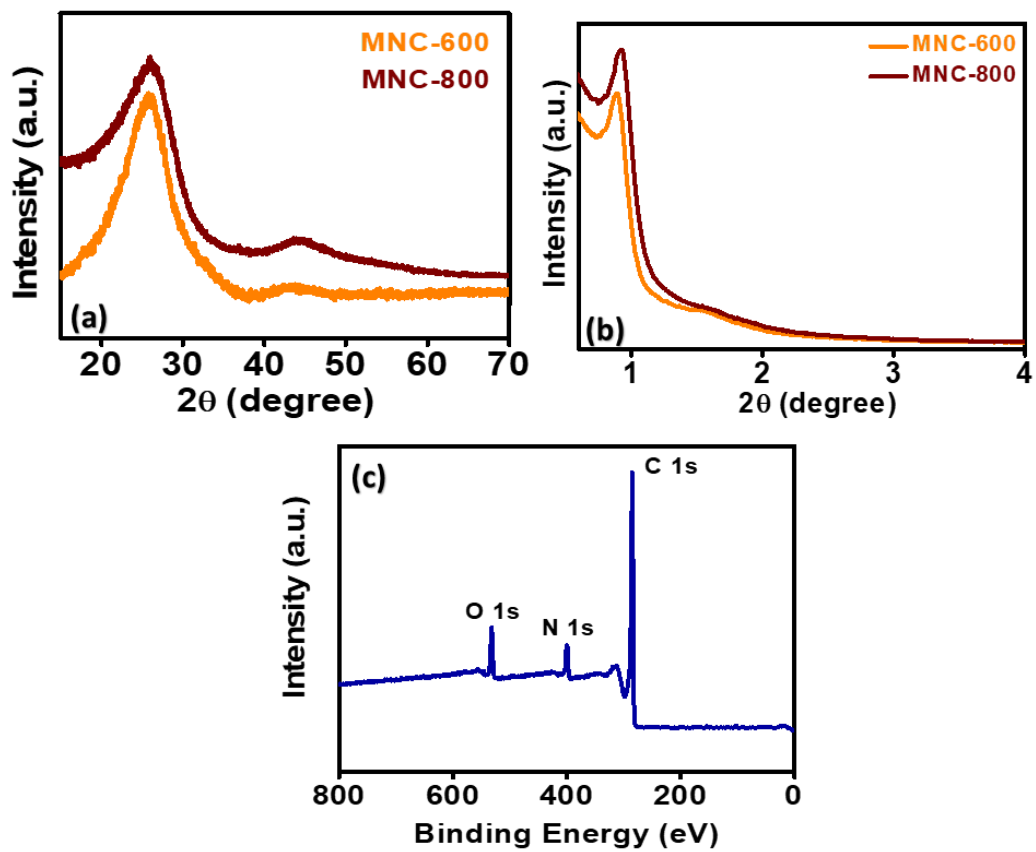

**Fig. S2** (a-b) P-XRD patterns for MNC-600 and MNC-800, (c) XPS survey spectrum of showing the presence of different elements.

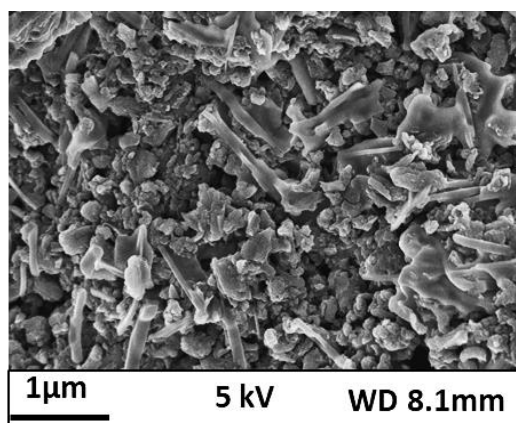

**Fig. S3** FE-SEM image of MNC-600 after the immobilization of AbCEA molecules.

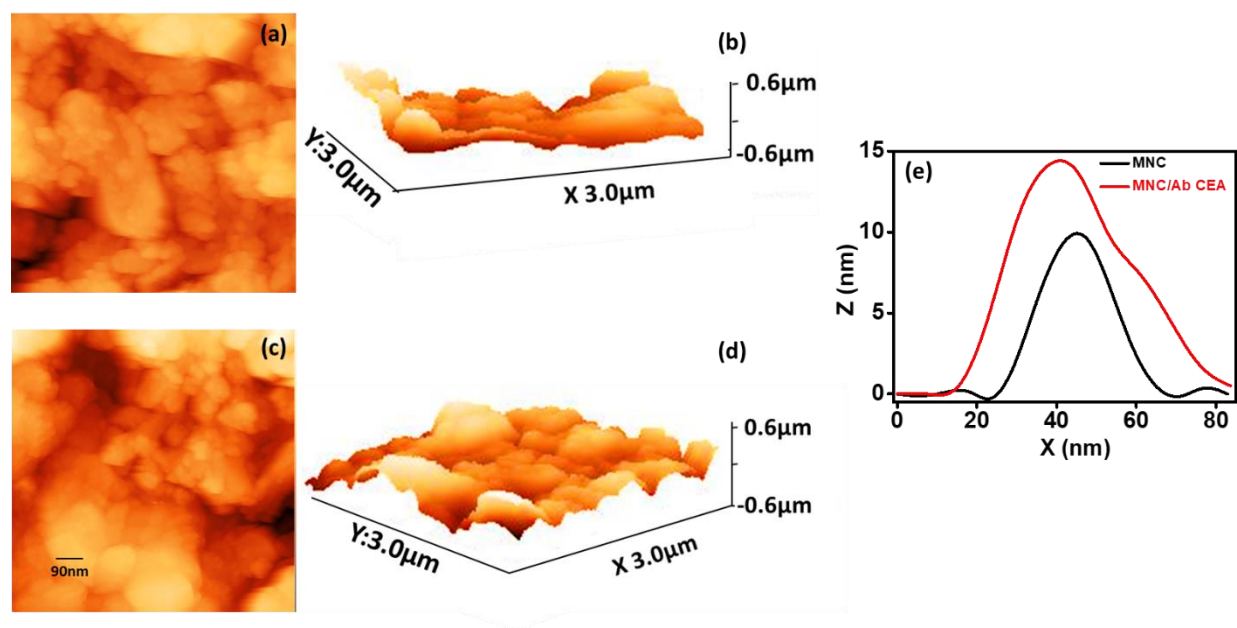

Figure S4. AFM images (a) Before immobilization of AbCEA (b) corresponding 3D image (c) After immobilization step (d) Corresponding 3D-image.

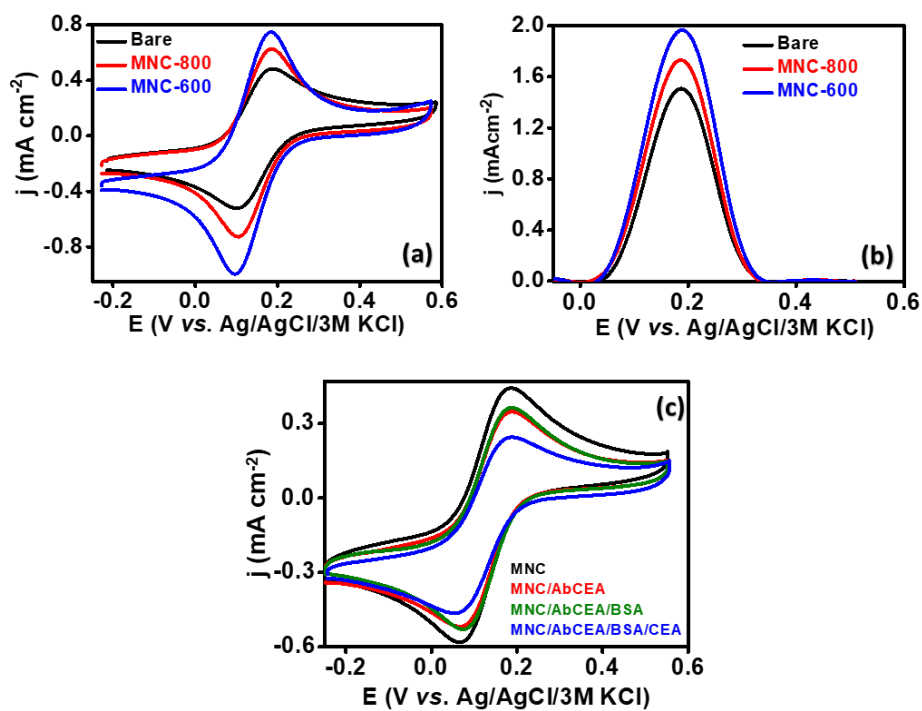

Fig. S5 (a) CV, (b) SWV curves showing the comparison electrochemical activities of different variants of MNC in 0.1 M PBS solution containing 5 mM of  $\text{Fe}^{3+}/\text{Fe}^{2+}$  solution, (d) CV plot showing the effect of BSA on modified electrode.

| <b>Table S1. Calculation of charge transfer resistance (<math>R_{ct}</math>)</b> |                                                  |                                                               |                                               |
|----------------------------------------------------------------------------------|--------------------------------------------------|---------------------------------------------------------------|-----------------------------------------------|
| <b>Material</b>                                                                  | <b><math>R_{ct}</math> (<math>\Omega</math>)</b> | <b>Rate constant (<math>K_s</math>) (<math>s^{-1}</math>)</b> | <b>Surface Coverage (<math>\theta</math>)</b> |
| MNC                                                                              | 136                                              | $12.6 \times 10^{-6}$                                         | $18.6 \times 10^{-3}$                         |
| MNC/Anti-CEA                                                                     | 162.5                                            | $10.5 \times 10^{-6}$                                         | $14.9 \times 10^{-3}$                         |
| MNC/Anti-CEA/CEA                                                                 | 202.2                                            | $8.5 \times 10^{-6}$                                          | $10.6 \times 10^{-3}$                         |

#### **Electrochemical surface area (ECSA) analysis:**

The electrochemical surface area (ECSA) was ascertained by calculating the “double-layer pseudo-capacitance” ( $C_{dl}$ ) in 0.1 M PBS (pH 7.4) containing 5 mM of  $Fe^{3+}/Fe^{2+}$ . Cyclic voltammetry tests were performed in the non-faradic region at various scan rates from 10 to 300  $mV s^{-1}$  over a potential range from 0.0 to 0.2 V. Slope obtained from the plot of averaged current  $(I_a+I_c)/2$ ; ( $I_a$  denotes anodic current and  $I_c$  is for cathodic current) density at a potential 0.11 V vs. the scan rate gave  $C_{dl}$ . The obtained  $C_{dl}$  was divided with the specific capacitance of the flat standard surface (20-60  $\mu F cm^{-2}$ ) which in the current study is considered to be 40  $\mu F cm^{-2}$ , gives electrochemical surface area (ECSA).<sup>1</sup> The roughness of the surface was calculated by dividing the obtained ECSA with the geometrical surface area to result in the roughness factor ( $R_f$ ).

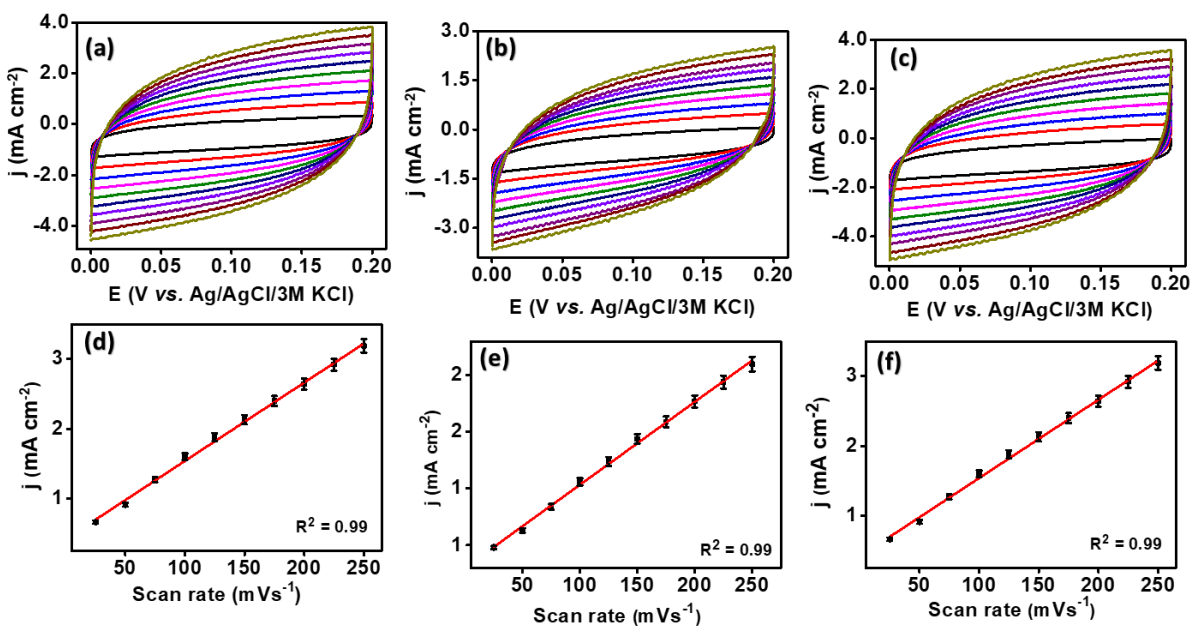

**Fig. S6** Cyclic voltammogram of (a) MNC (b) MNC/Ab CEA and (c) MNC/Ab CEA/CEA respectively in the non-faradic region at various scan rates ranging from 10 to 300 mV s<sup>-1</sup> and (d-f) corresponding plot of average current densities versus scan rate.

| Table S2. Electrochemical surface area (ECSA) analysis |                  |                                                         |                               |                         |                         |
|--------------------------------------------------------|------------------|---------------------------------------------------------|-------------------------------|-------------------------|-------------------------|
| Sr. No                                                 | Catalyst         | Electrolyte                                             | $C_{dl}$ ( $\mu$ F) at 0.11 V | ECSA (cm <sup>2</sup> ) | Roughness factor (a.u.) |
| 1                                                      | MNC              | 0.1 M PBS + 5 mM K <sub>4</sub> [Fe (CN) <sub>6</sub> ] | 12.3                          | 0.31                    | 10                      |
| 2                                                      | MNC/AntiCEA      | 0.1 M PBS + 5 mM K <sub>4</sub> [Fe (CN) <sub>6</sub> ] | 11.2                          | 0.28                    | 9.03                    |
| 3                                                      | MNC/Anti-CEA/CEA | 0.1 M PBS + 5mM K <sub>4</sub> [Fe (CN) <sub>6</sub> ]  | 7.3                           | 0.18                    | 5.80                    |

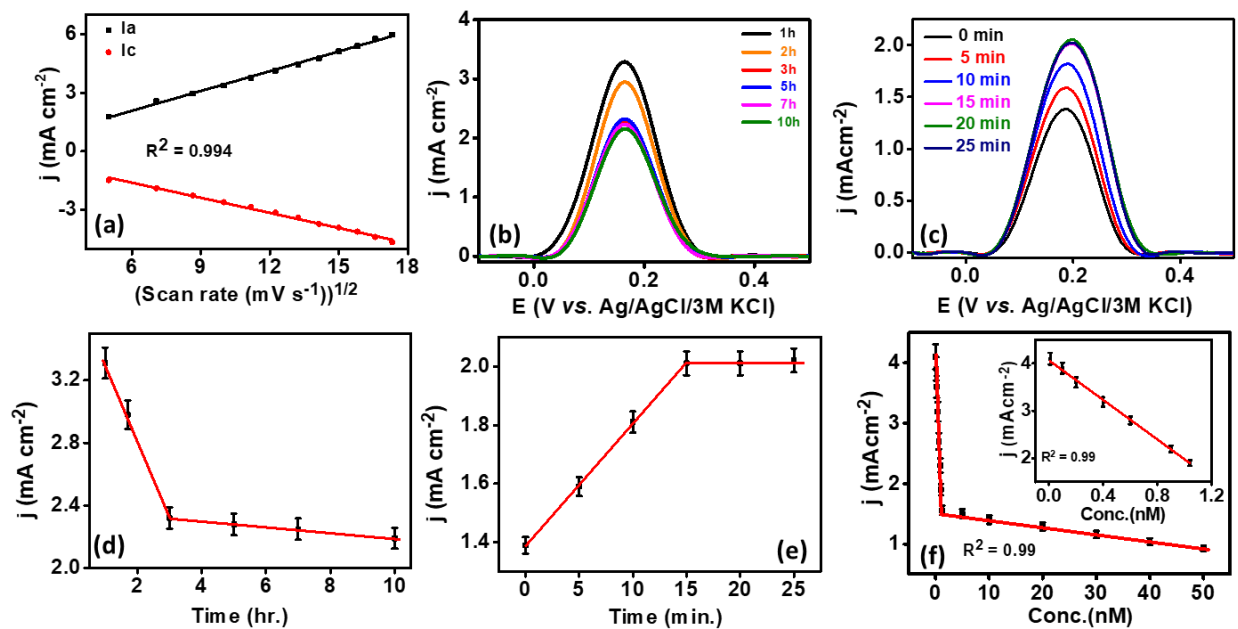

**Fig. S7** (a) The linear curves between average current density versus scan rate extracted from fig. 2d.SWV showing optimization of incubation time for (b) AbCEA (c) CEA in 0.1 M PBS (pH 7.4) containing 5 mM of Fe<sup>3+</sup>/Fe<sup>2+</sup> solution and (d-e) corresponding calibration graphs. (f) Linear range curves extracted from Fig. 2e, (inset: graph showing the linearity from 10 pM to 1 nM).

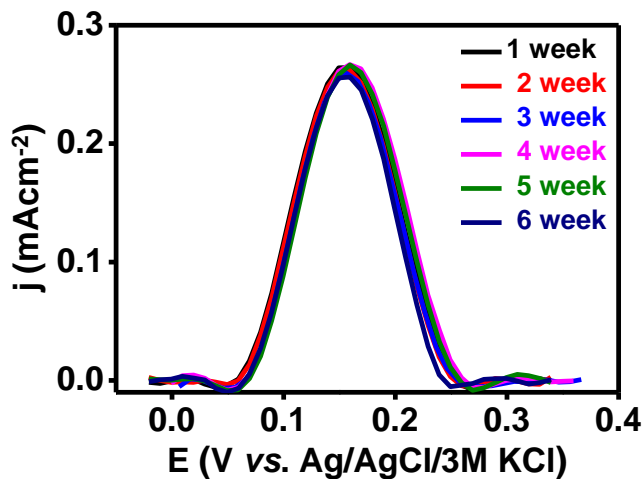

**Fig. S8** SWV representing the long term storage stability of immunosensor.

**Table S3.** Comparison of MNC based immunosensor with previously reported labelled and label free immunosensors.

| Material                                            | Technique         | Detection Range<br>ng ml <sup>-1</sup>            | Incubation Time of<br>immunocomplex<br>(min.) | Storage<br>stability<br>(Weeks) | LOD<br>(ng ml <sup>-1</sup> ) | Ref                  |
|-----------------------------------------------------|-------------------|---------------------------------------------------|-----------------------------------------------|---------------------------------|-------------------------------|----------------------|
| Rh@PdNDs/MWCNTs<br>-SO <sub>3</sub> H               | Label free        | 25x 10 <sup>-6</sup> - 100                        | 25                                            | 2.1                             | 8.3x 10 <sup>-6</sup>         | 2                    |
| polyCBMA/PANI                                       | Label free        | 0.01 x 10 <sup>-3</sup> - 0.1                     | 45                                            | 01                              | 3.05 x 10 <sup>-6</sup>       | 3                    |
| Ag/MoS <sub>2</sub> @Fe <sub>3</sub> O <sub>4</sub> | Labelled          | 0.0001– 20                                        | 90                                            | 3.6                             | 0.03 x 10 <sup>-3</sup>       | 4                    |
| Au-Ag/rGO@PDA                                       | Label free        | 0.001 - 80                                        | 40                                            | 04                              | 0.286 x 10 <sup>-3</sup>      | 5                    |
| Graphene-zirconia<br>nanocomposite (GZ)             | Label free        | 0.01 - 10                                         | 75                                            | 2.8                             | 4.25 x 10 <sup>-3</sup>       | 6                    |
| PPI and CNDTs                                       | Label free        | 0.005 - 300                                       | 50                                            | 02                              | 0.00145                       | 7                    |
| Au@Bi nanospheres<br>(NSs)                          | Labelled          | 50 – 100                                          | 30                                            | 2.1                             | 9.83 x 10 <sup>-6</sup>       | 8                    |
| Ni/C@SiO <sub>2</sub>                               | Labelled          | 0.006 - 12                                        | 20                                            | 04                              | 1.56 x 10 <sup>-6</sup>       | 9                    |
| GO/Fe <sub>3</sub> O <sub>4</sub> -Pd-<br>Ag        | Label free        | 1 x 10 <sup>-3</sup> - 80                         | 30                                            | 04                              | 0.2 x 10 <sup>-3</sup>        | 10                   |
| CSAuNPs-PEDOT-PB<br>cry/SPCE                        | Label free        | 1.0 × 10 <sup>-4</sup> - 1.0<br>× 10 <sup>3</sup> | 15                                            | 05                              | 5.05 X 10 <sup>-5</sup>       | 11                   |
| MoS <sub>2</sub> -AuNPs                             | Labelled          | 10× 10 <sup>-4</sup> –1.0                         | 50                                            | 2.2                             | 1.2 X 10 <sup>-5</sup>        | 12                   |
| Au-β-CD/MXene<br>@PANI/FTO                          | Label free        | 0.5 – 350                                         | 40                                            | 1.4                             | 0.0429 X 10 <sup>-5</sup>     | 13                   |
| Au@Bi NSs                                           | Label free        | 50 x 10 <sup>-6</sup> –100                        | 30                                            | 2.1                             | 9.83 X 10 <sup>-5</sup>       | 14                   |
| PtNPs@rGO@PS NS                                     | Label free        | 0.05 - 70                                         | 60                                            | 0.7                             | 0.01                          | 15                   |
| Cu-THQ                                              | Labelled          | 1 x 10 <sup>-6</sup> - 40                         | 35                                            | 3.5                             | 0.477X10 <sup>-6</sup>        | 16                   |
| Ag@CNCs                                             | Label free        | 0.0001 - 100                                      | 30                                            | 1.4                             | 5.12 X10 <sup>-3</sup>        | 17                   |
| CuCo/CNC                                            | Labelled          | 0.0001–80                                         | 25                                            | 05                              | 0.031 X 10 <sup>-5</sup>      | 18                   |
| Ag@SiO <sub>2</sub>                                 | Label free        | 0.5 - 10                                          | 17                                            | 04                              | 0.01                          | 19                   |
| tCHI/dPNMA/SPCE                                     | Label free        | 0.01 – 30                                         | 40                                            | 3.8                             | 0.01                          | 20                   |
| <b>Mesoporous<br/>nitrogen carbon<br/>(MNC)</b>     | <b>Label free</b> | <b>0.009 – 1000</b>                               | <b>15</b>                                     | <b>06</b>                       | <b>9.04 X 10<sup>-3</sup></b> | <b>This<br/>Work</b> |

| Table S4. Human serum sample analysis for CEA. |                   |                  |                  |              |         |
|------------------------------------------------|-------------------|------------------|------------------|--------------|---------|
|                                                | Actual conc. (pM) | Conc. Added (pM) | Conc. Found (pM) | Recovery (%) | RSD (%) |
| 1.                                             | 23.2              | 200              | 223              | 99.3         | 1.8     |
| 2                                              | 23.2              | 400              | 438              | 103.7        | 0.64    |
| 3                                              | 23.2              | 600              | 642              | 101.4        | 0.04    |
| 4                                              | 23.2              | 800              | 861              | 103.3        | 0.05    |

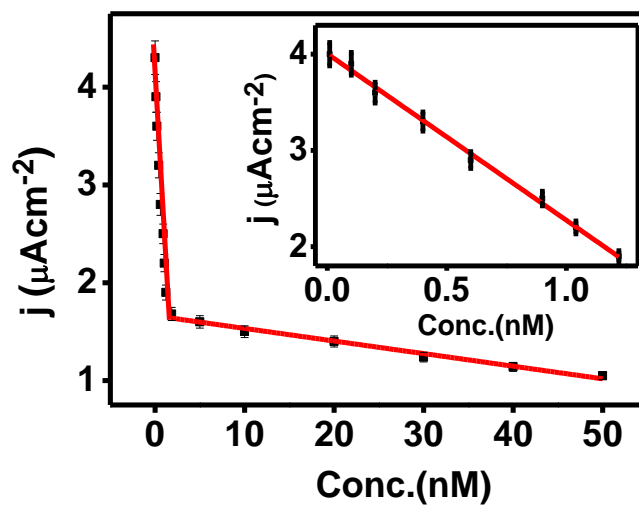

Fig. S9 The linear curves between average current density versus concentration extracted from figure 4d.



## References

1. Mehta D, Kafle A, Nagaiah TC. *J.Mater.Chem.B.* 2023,**11**,11103-9.
2. H. Lv, Y. Li, X. Zhang, Z. Gao, J. Feng, P. Wang and Y. Dong, *Anal.Chim.Acta.*, 2018, **1007**, 61-70.
3. J. Wang and N. Hui, *Bioelectrochemistry*, 2019, **125**, 90-96.
4. Wang Y, Zhao G, Zhang Y, Pang X, Cao W, Du B, Wei Q. *Sens. Actuators B Chem.*,2018, **266**,561-9.
5. M. Rizwan, S. Elma, S. A. Lim and M. U. Ahmed, *Biosensors and Bioelectronics*, 2018, **107**, 211-217.
6. Y. Yang, M. Jiang, K. Cao, M. Wu, C. Zhao, H. Li and C. Hong, *Microchem.J.*, 2019, **151**, 104223.
7. L. P. Lin, S.-Y. Tham, H.-S. Loh and M. T. Tan, *Sci. rep.*, 2021, **11**, 22536.
8. A. O. Idris, N. Mabuba and O. A. Arotiba, *Biosensors*, 2019, **9**, 39.
9. Song D, Zheng J, Myung NV, Xu J, Zhang M. *Talanta.*, 2021, **225**, 122006.
10. G. Paimard, M. Shahlaei, P. Moradipour, H. Akbari, M. Jafari and E. Arkan, *Sens. Actuators B: Chem.*, 2020, **311**, 127928.
11. J. Li, L. Liu, Y. Ai, Y. Liu, H. Sun and Q. Liang, *ACS Appl. Mater. Inter.*, 2020, **12**, 5500-5510.
12. Su S, Sun Q, Wan L, Gu X, Zhu D, Zhou Y, Chao J, Wang L. *Biosens.Bioelectron.*, 2019,**140**,111353.
13. S. Chen, M. Wu, L. Shi and C. Hong, *Chem.Select*, 2023, **8**, e202203063.
14. J. Choosang, S. Khumngern, N. Nontipichet, P. Thavarungkul, P. Kanatharana and A. Numnuam, *Microchem. Journal*, 2023, 108435.
15. Q. Wang, H. Xin and Z. Wang, *Biosensors*, 2022, **12**, 657.
16. Jiang M, Zhang M, Qiao X, Hong C. *Microchim.Acta.* 2022, **189**, 441.
17. Ding M, Zha L, Wang H, Liu J, Chen P, Zhao Y, Jiang L, Li Y, Ouyang R, Miao Y. *RSC advances*. 2021, **11**, 16339-50.
18. Wang X, Liao X, Zhang B, Zhang M, Mei L, Wang F, Chen S, Qiao X, Hong C. *Microchim.Acta.* 2021, **188**,1-11.
19. Singh P, Katkar PK, Patil UM, Bohara RA. *RSC advances*. 2021, **11**, 10130-43.
20. Direksilp C, Parinyanitikul N, Ariyasajjamongkol N, Sirivat A. *Bioelectrochemistry.*,2023, **152**,108446.
